# Supplementary material for: A series of d10coordination polymers constructed with a rigid tripodal imidazole ligand and varied polycarboxylates: syntheses, structures and luminescence properties
Source: Royal Society of Chemistry journal article supplement (doi:10.1039/c4ce02551b), 2015-01-01
Supplement: c4ce02551b1.pdf [file c4ce02551b1.pdf]

## Supporting Information

### **A series of d<sup>10</sup> coordination polymers constructed with a rigid tripodal imidazole ligand and varied polycarboxylates: syntheses, structures and luminescent properties**

**Zhenzhen Xue,<sup>a,b</sup> Tianlu Sheng,<sup>a</sup> Yanlong Wang,<sup>a,b</sup> Shengmin Hu,<sup>a</sup> Yuehong Wen,<sup>a</sup> Yong Wang,<sup>a,b</sup> Haoran Li,<sup>a,b</sup> Ruibiao Fu<sup>a</sup> and Xintao Wu<sup>\*a</sup>**

*<sup>a</sup>State Key Laboratory of Structure Chemistry, Fujian Institute of Research on the Structure of Matter, Chinese Academy of Sciences, Fuzhou, 350002, China.*

*<sup>b</sup>University of the Chinese Academy of Sciences, Beijing, 100049, China.*

E-mail: [wxt@fjirsm.ac.cn](mailto:wxt@fjirsm.ac.cn); Fax: +86-591-83719238; Tel: +86-591-83719238

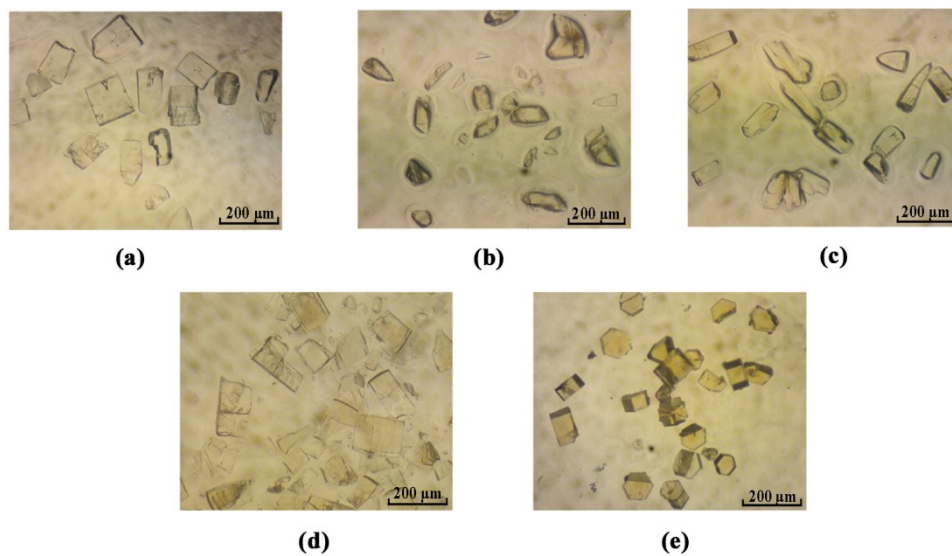

**Figure S1** Photographic images of compound 1 (a), 2 (b), 3 (c), 4 (d), 5 (e).

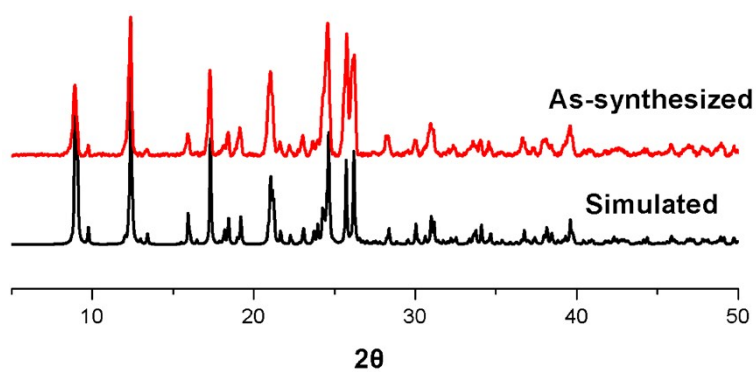

**Figure S2** PXRD patterns of simulated from the single-crystal data of compound 1 (black); as-synthesized (red).

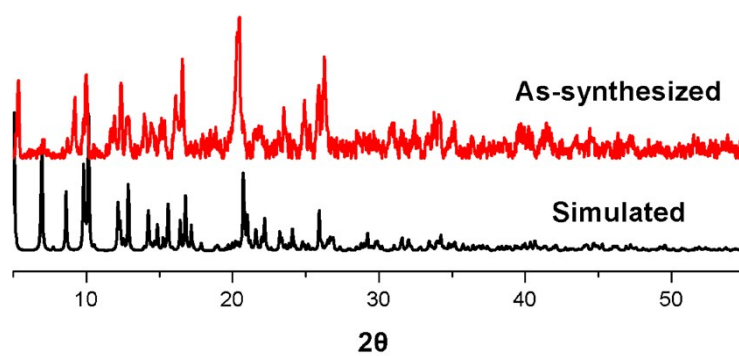

**Figure S3** PXRD patterns of simulated from the single-crystal data of compound 2 (black); as-synthesized (red).

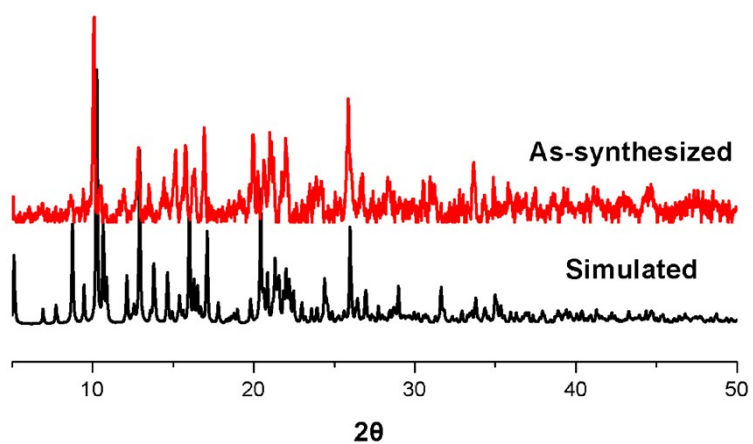

**Figure S4** PXRD patterns of simulated from the single-crystal data of compound **3** (black); as-synthesized (red).

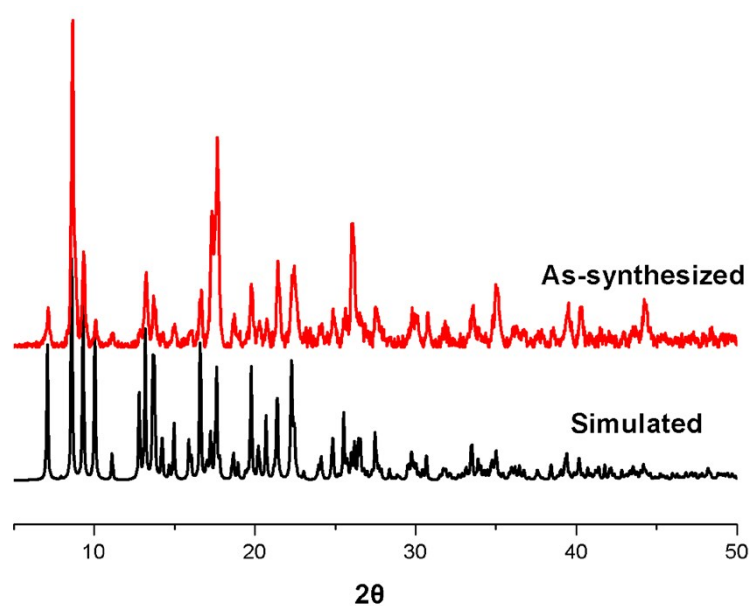

**Figure S5** PXRD patterns of simulated from the single-crystal data of compound **4** (black); as-synthesized (red).

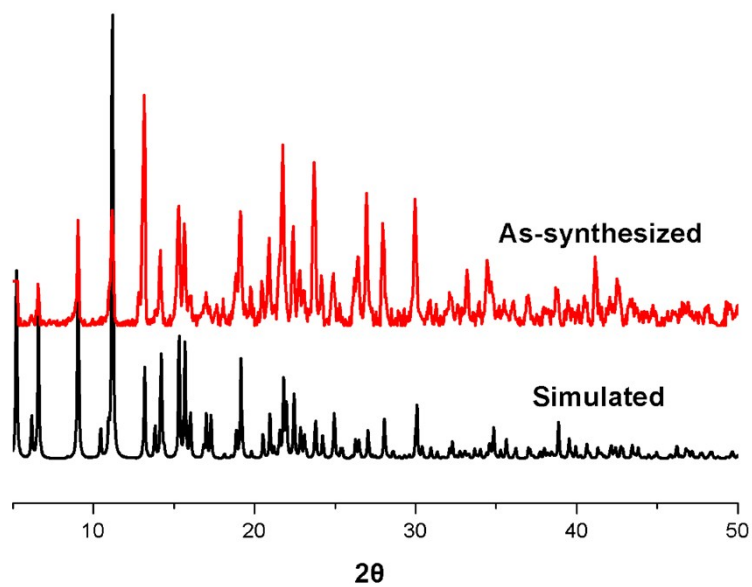

**Figure S6** PXRD patterns of simulated from the single-crystal data of compound **5** (black); as-synthesized (red).

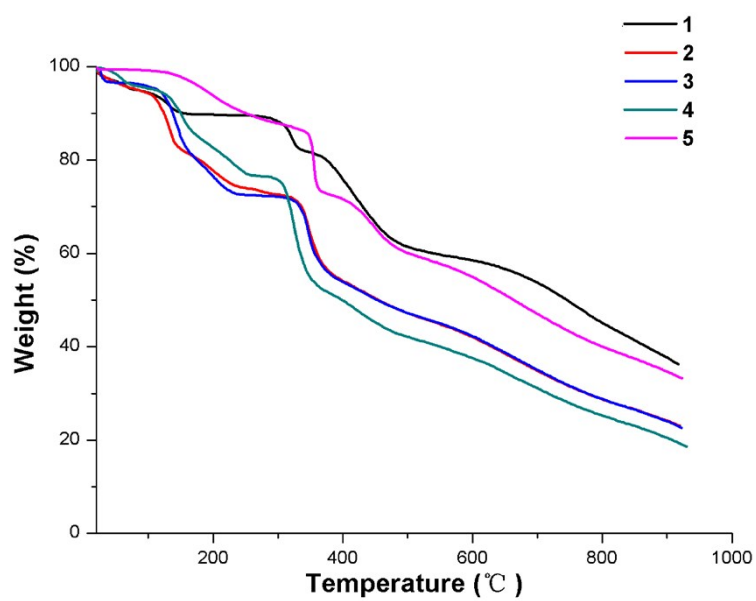

**Figure S7** TGA curves for compounds **1-5**.
